# Supplementary material for: Stepwise optimization of genetic RuBisCO-equipped Escherichia coli for low carbon-footprint protein and chemical production
Source: Royal Society of Chemistry journal article supplement (doi:10.1039/d1gc00456e), 2021-01-01
Supplement: d1gc00456e1.pdf [file d1gc00456e1.pdf]

## Supplementary Information

Stepwise optimization of genetic RuBisCO-equipped *Escherichia coli* for low carbon-footprint protein and chemical production

Shih-I Tan, I-Son Ng\*

Department of Chemical Engineering, National Cheng Kung University, Tainan 70101,  
Taiwan

\*Corresponding author: Prof. I-Son Ng

E-mail: [yswu@mail.ncku.edu.tw](mailto:yswu@mail.ncku.edu.tw)

ORCID:

I-Son Ng: [0000-0003-1659-5814](https://orcid.org/0000-0003-1659-5814)

Shih-I Tan: [0000-0002-7632-9991](https://orcid.org/0000-0002-7632-9991)

Tel: +866-62757575; Fax: +86-62344496

## Supplementary Note 1

For calculation of CO<sub>2</sub> assimilation, we build up the mass balance method as following:

First, we defined the input and output carbon listed below based on the Figure S1

$$\text{Input carbons: } 0.27 \times [CO_2]_{input} + 0.4 \times [Xylose]$$

$$\text{Output carbons: } 0.27 \times [CO_2]_{output} + C_{biomass} \times [Biomass] + \sum [C_n, \text{metabolites}]$$

For a steady state assumption, the input was equal to output as following in which the net carbon was determined as the input carbon subtracted by the output carbon:

$$[CO_2]_{net} = [CO_2]_{input} - [CO_2]_{output} = \frac{C_{biomass} \times [Biomass]}{0.27} + \sum \frac{[C_n, \text{metabolites}]}{0.27} - 1.48 \times [Xylose]$$

Next, the metabolites were neglected since there was no significant metabolites, thus the calculation could be simplified as following:

$$[CO_2]_{net} = \frac{C_{biomass} \times [Biomass]}{0.27} - 1.48 \times [Xylose]$$

To compare each system, the net carbon was normalized by the biomass as the CO<sub>2</sub> assimilation capability calculated as following:

$$CO_2 \text{ assimilation capability} = [CO_2]_{net}^* = \frac{C_{Biomass} \times [Biomass] - 0.4 \times [Xylose]}{[Biomass]} \times \frac{1}{0.27}$$

Following two tables showed the examples to calculate the CO<sub>2</sub> assimilation capability. The first table was the raw data containing the final OD of the culture and that from the analysis of the moisture dryer and the HPLC. The second table illustrated our detailed calculation of CO<sub>2</sub> assimilation capability.

| Sample     | Final OD<br>(OD <sub>f</sub> ) | Empty plate (g)<br>(W <sub>0</sub> ) | After drying (g)<br>(W <sub>d</sub> ) | OD used for<br>drying (OD <sub>d</sub> ) | Cell volume<br>(mL) (V <sub>d</sub> ) | Xylose<br>(g/L) |
|------------|--------------------------------|--------------------------------------|---------------------------------------|------------------------------------------|---------------------------------------|-----------------|
| BD-hCAII   | 1.038                          | 0.1985                               | 0.2224                                | 0                                        | 3                                     | 0               |
| I2/SSCI-CA | 1.275                          | 0.2058                               | 0.2425                                | 0                                        | 3                                     | 0               |

| Formula    | $\frac{(W_d - W_0) \times 1000}{OD_d \times V_d}$ | $\frac{Biomass}{OD} \times OD_f$ | $\frac{C_{Biomass} \times [Biomass] - 0.4 \times [Xylose]}{[Biomass]}$    |
|------------|---------------------------------------------------|----------------------------------|---------------------------------------------------------------------------|
| Sample     | Biomass/OD<br>(g/L/OD)                            | Final Biomass<br>(g/L)           | CO <sub>2</sub> assimilation capability<br>(g-CO <sub>2</sub> /g-biomass) |
| BD-hCAII   | 0.7967                                            | 0.827                            | <b>-7.27</b>                                                              |
| I2/SSCI-CA | 1.2233                                            | 1.560                            | <b>-3.06</b>                                                              |

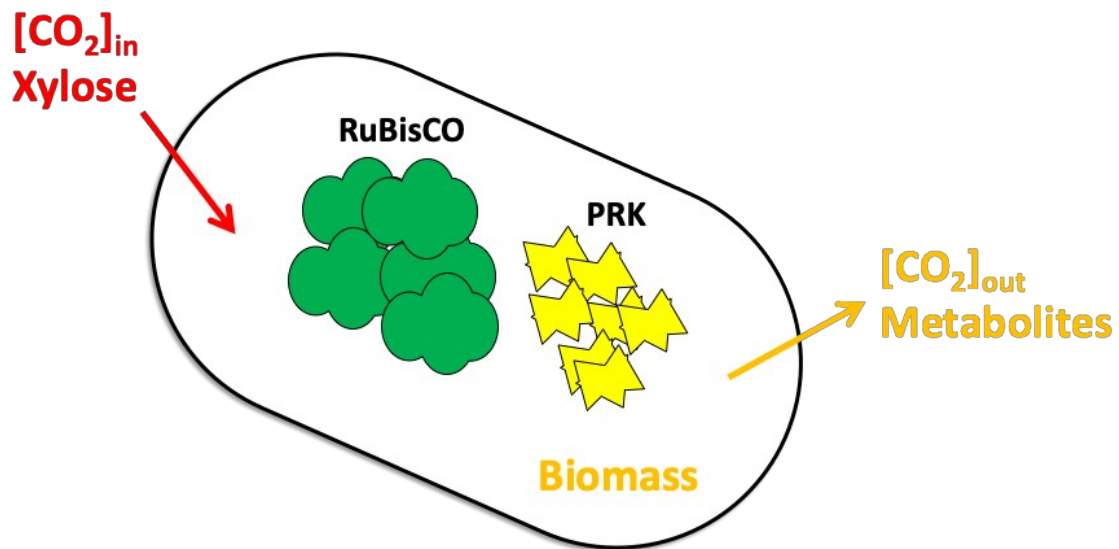

Fig. S1 mass balance for calculation of CO<sub>2</sub> assimilation capability

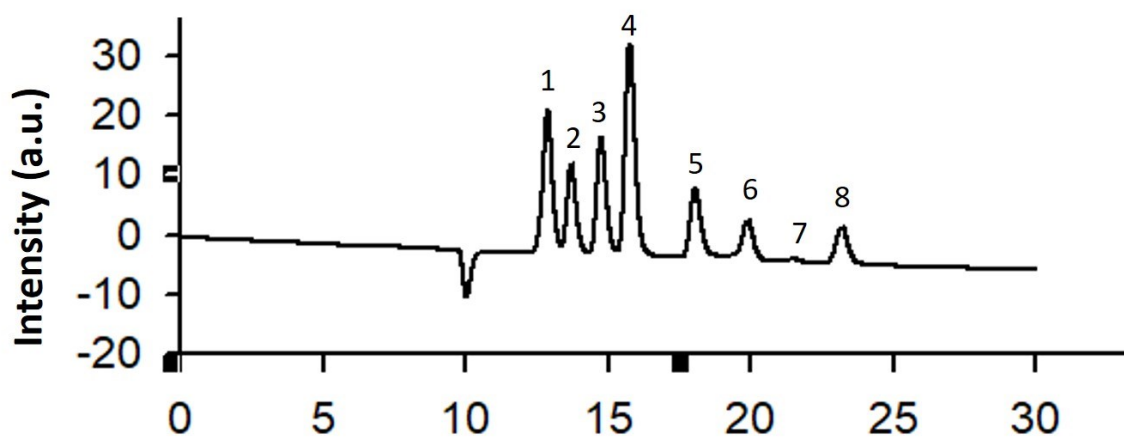

| No.      | Chemical      | RT (min)     | No. | Chemical  | RT (min) |
|----------|---------------|--------------|-----|-----------|----------|
| 1        | Citrate       | 12.89        | 5   | Succinate | 18.1     |
| 2        | Malate        | 13.78        | 6   | Lactate   | 19.12    |
| 3        | Glucose       | 14.78        | 7   | Formate   | 21.51    |
| <b>4</b> | <b>Xylose</b> | <b>15.74</b> | 8   | Acetate   | 23.22    |

Fig. S2 HPLC spectrum of 8 chemicals separated by our HPLC condition and detected by RI detector.

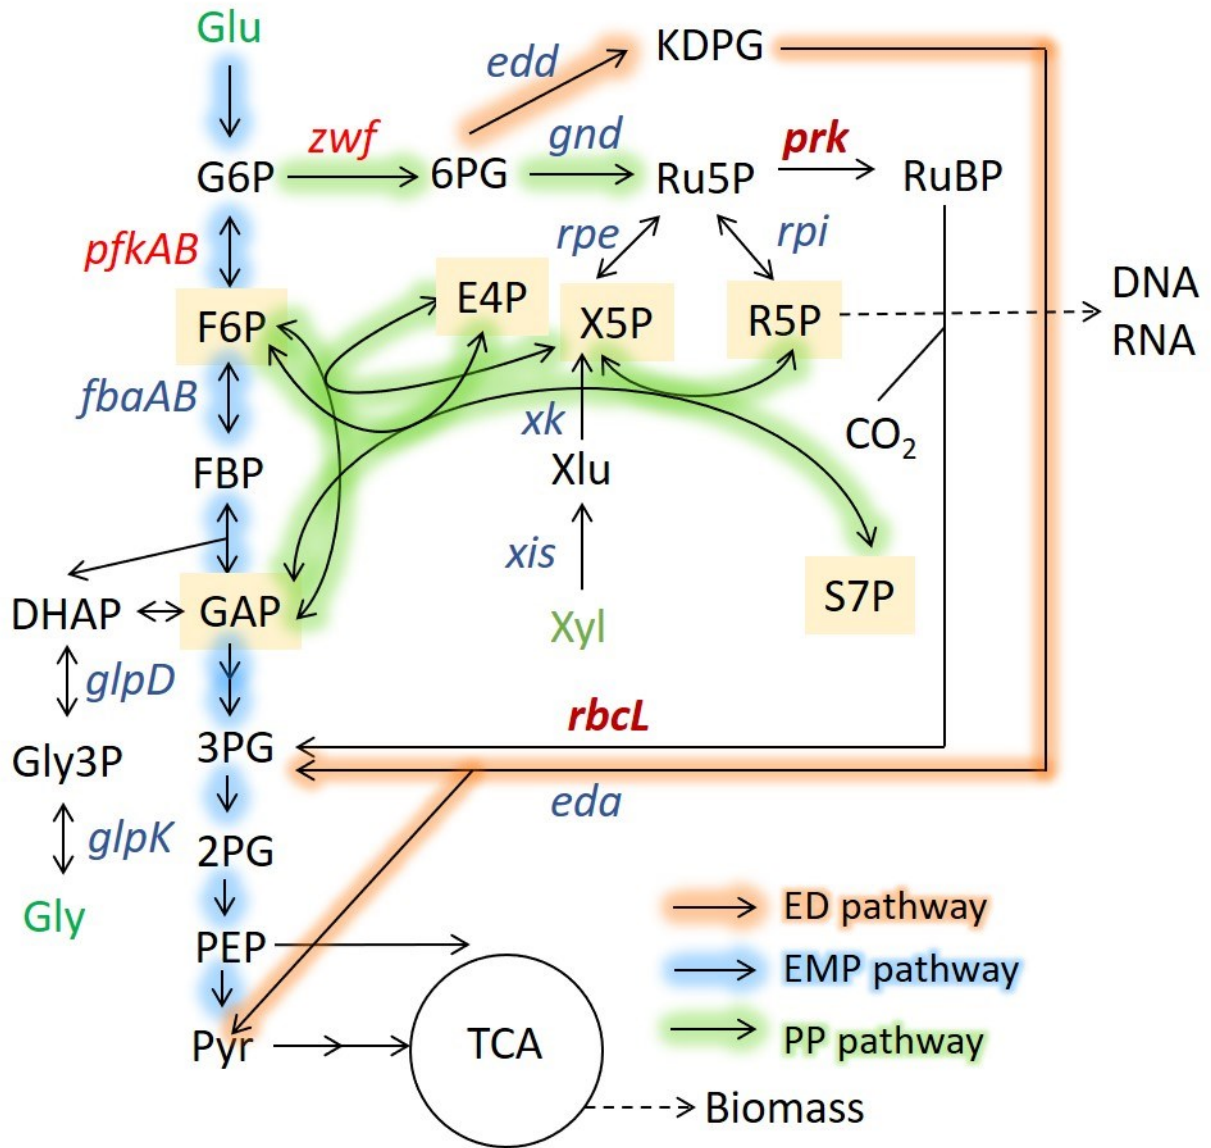

Fig. S3 The PP pathway is used for enhancing the carbon flux to the RuBisCO-equipped *E. coli*.

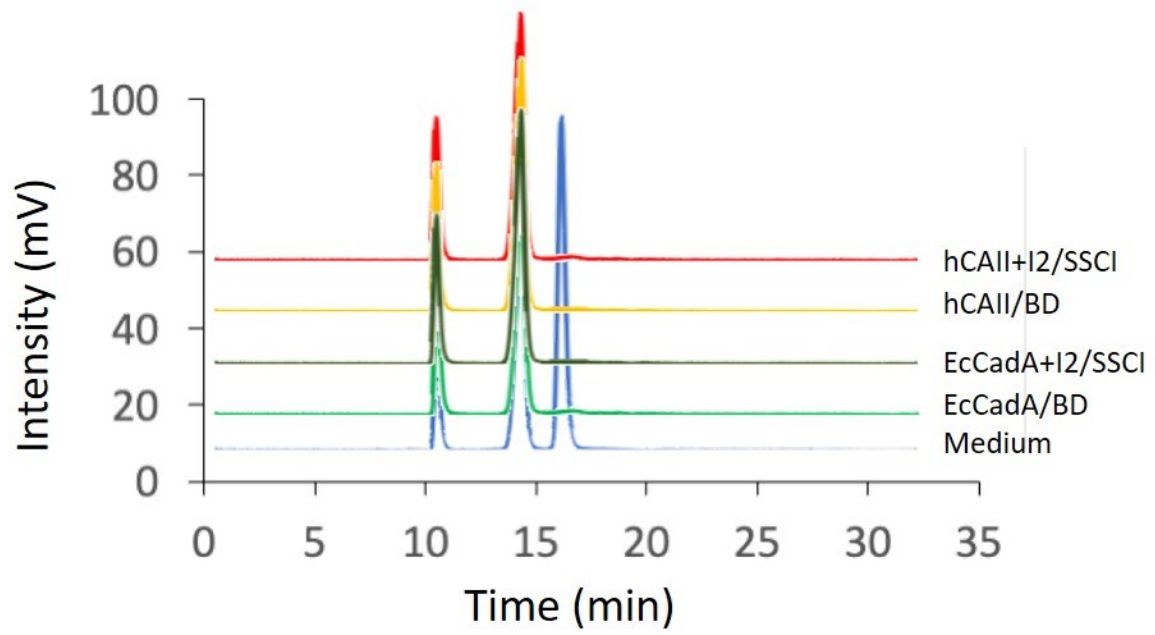

Fig. S4 HPLC analysis of the cell expressing the EcCadA or hCAII in I2/SSCI and BD, respectively.

Table S1 Primers used in this study.

| Primers                 | Sequence (5'-3')                                            |
|-------------------------|-------------------------------------------------------------|
| HindIII-SePRK(7942)-F   | GCAAGCTTATGAGTAAACCAGACCGCGTAGTGCTG                         |
| PstI-SpeI-SePRK(7942)-R | CACTGCAGCGGCCGCTACTAGTTCAAACGGAGGCGGCAACTGGAGCA             |
| HindIII-CaPRK-F         | GCAAGCTTATGACTCAAGATAGAGTAGTTATTATCGG                       |
| PstI-CaPRK-R            | GACTGCAGTTATACTTGAGCAACTTCTTCTTCTGTG                        |
| SePRK(7002)-VF          | GAAAGGGGCGATCGCCGCAAGCGTATAGCTGCAGGAGTCACTAAGG<br>GTTAG     |
| SePRK(7002)-VR          | CTACACGGTCTGTCTGACTGGTCATAAGCTTTTTCTCCTCTTTGGATCC<br>TC     |
| SePRK(7002)-IF          | GAGGATCCAAAGAGGAGAAAAAGCTTATGACCAGTCAGACAGACCG<br>TGTAG     |
| SePRK(7002)-IR          | CTAACCCCTTAGTGACTCCTGCAGCTATACGCTTGCGGCGATCGCCCT<br>TTC     |
| RcPRK-VF                | GATCGAGCGTCTGGTGCGCGAAGGCCGTTGACTGCAGGAGTCACTAA<br>GGGTTAG  |
| RcPRK-VR                | CGGAAGATCTGGTTCGAAGGTCATAAGCTTTTTCTCCTCTTTGGATCCT<br>C      |
| RcPRK-IF                | GAGGATCCAAAGAGGAGAAAAAGCTTATGACCTTCGACCAGATCTTC<br>CG       |
| RcPRK-IR                | CTAACCCCTTAGTGACTCCTGCAGTCAACGGCCTTCGCGCACCAGACGC<br>TCGATC |
| 28a-VF                  | GTTGCTCTGGGCGTGAAGTAAAGCTTTGAGATCCGGCTGCTAACAA<br>AGCCC     |
| 28a-VR                  | GCGTAACGGTTAGACTGATCCATCATATGGCTGCCGCGCGGCACCAG             |
| RcCbbM-IF               | CTGGTGCCGCGCGGCAGCCATATGATGGATCAGTCTAACCGTTACGC             |
| RcCbbM-IR               | GGGCTTTGTTAGCAGCCGGATCTCAAAGCTTTCAGTTCACGCCAGAG<br>CAAC     |
| SacI-pSB4A3-BioB-F      | CTGAGCTCGATTACTTCGCGTTTGCCACCTG                             |
| Sall-pSB4A3-BioB-R      | CTGTGACCGGAGGCTTTTGACTTTCTGCTAATC                           |
| Cm-short-F              | ATGATGAACCTGAATCGCCAGC                                      |
| Cm-short-R              | CAAGATGTGGCGTGTACGGTG                                       |
| Km-short-F              | GTAATGGCTGGCCTGTTGAACAAG                                    |
| Km-short-R              | GTTCCATAGGATGGCAAGATC                                       |
| Ap-short-F              | CAGAATGACTTGGTTGAGTACTC                                     |
| Ap-short-R              | CAACGATCAAGGCGAGTTACATG                                     |
| GroELS-short-F          | GCATGATCGCGTGATCGTCAAGC                                     |
| GroELS-short-R          | CACACCGTAGCCATCGTTGAAAA                                     |

Table S2 Elemental analysis of BD and SSA strains harboring pSIT-RcHemA for ALA production.

| Elements     | Element percentage (%) |         |         |        |         |         |
|--------------|------------------------|---------|---------|--------|---------|---------|
|              | BD                     |         |         | SSA    |         |         |
|              | Test I                 | Test II | Average | Test I | Test II | Average |
| Nitrogen (N) | 13.40                  | 13.16   | 12.39   | 13.79  | 13.84   | 11.82   |
| Carbon (C)   | 43.73                  | 43.52   | 43.63   | 45.66  | 45.81   | 45.73   |
| Hydrogen (H) | 7.28                   | 7.45    | 7.35    | 7.53   | 7.39    | 7.46    |



Table S3 The calculation of accumulated carbon and CO<sub>2</sub> assimilation capability.

| Strain | Biomass (g/L) | ALA (g/L) | Carbon content in biomass (%)* | C <sup>13</sup> /C <sup>12</sup> ratio <sup>#</sup> | C <sup>12</sup> (g/L) | Carbon in biomass (g/L) | Carbon in ALA (g/L)** | Accumulated carbon (g/L) | CO <sub>2</sub> assimilation capability (g-CO <sub>2</sub> /g-DCW) |
|--------|---------------|-----------|--------------------------------|-----------------------------------------------------|-----------------------|-------------------------|-----------------------|--------------------------|--------------------------------------------------------------------|
| BD     | 2.8           | 5.0       | 43.626                         | 99.71                                               | 0.012                 | 1.222                   | 2.290                 | 3.51                     | -9.10                                                              |
| SSA    | 5.5           | 3.8       | 45.732                         | 72.21                                               | 0.034                 | 2.515                   | 1.740                 | 4.25                     | -4.13                                                              |

\*Carbon content is the data from elemental analysis.

# C<sup>13</sup>/C<sup>12</sup> ratio is provided from Elemental Analyzer coupled with isotope ratio mass spectrometer (EA-IRMS).

\*\* Carbon in ALA is calculated by ALA amount with the ratio of 60/131 (i.e., the ratio of molecular weight for C5 and ALA).

Table S4 Elemental analysis of cell expressing the EcCadA and hCAII.

| Elements     | Element percentage (%) |         |         |        |         |         |
|--------------|------------------------|---------|---------|--------|---------|---------|
|              | EcCadA                 |         |         | hCAII  |         |         |
|              | Test I                 | Test II | Average | Test I | Test II | Average |
| Nitrogen (N) | 12.50                  | 12.27   | 12.39   | 11.96  | 11.98   | 11.97   |
| Carbon (C)   | 46.22                  | 46.12   | 46.17   | 45.47  | 45.49   | 45.48   |
| Hydrogen (H) | 7.14                   | 7.02    | 7.08    | 6.92   | 6.941   | 6.93    |
